# Supplementary material for: The Genetic Spectrum of Familial Hypercholesterolemia (FH) in the Iranian Population
Source: PubMed Central journal article supplement (PMC5719081; doi:10.1038/s41598-017-17181-9), 2017-12-06
Supplement: 41598_2017_17181_MOESM1_ESM.pdf [file 41598_2017_17181_MOESM1_ESM.pdf]

# **The Genetic Spectrum of Familial Hypercholesterolemia (FH) in the Iranian Population**

Fairoozy, R. H.<sup>1,2</sup>, Futema, M.<sup>3</sup>, Vakili, R.<sup>4,5</sup>, Abbaszadegan, M. R.<sup>5</sup>, Hosseini, S.<sup>5</sup>, Aminzadeh, M.<sup>6</sup>, Zaeri, H.<sup>7</sup>, Mobini, M.<sup>8</sup>, Humphries, S. E.<sup>1\*</sup>, Sahebkar, A.<sup>9</sup>

<sup>1</sup> Cardiovascular Genetics, Institute of Cardiovascular Science, University College London, London, United Kingdom.

<sup>2</sup> Molecular Diagnostic Unit, Clinical Laboratory Department, King Abdullah Medical city in Makkah, Makkah, Saudi Arabia

<sup>3</sup> Centre for Cardiology in the Young, Institute of Cardiovascular Science, University College London, United Kingdom

<sup>4</sup> Department of Pediatric Endocrinology and Metabolism, Faculty of Medicine, Mashhad University of Medical Sciences, Mashhad, Iran.

<sup>5</sup> Medical Genetics Research Center, Mashhad University of Medical Sciences, Mashhad, Iran

<sup>6</sup> Diabetes Research Center, Ahvaz Jundishapur University of Medical Sciences, Ahvaz, Iran

<sup>7</sup> Neonatal and Children Health Research Centre, Golestan University of Medical Sciences, Gorgan, Iran

<sup>8</sup> School of Medicine, Mashhad University of Medical Sciences, Mashhad, Iran

<sup>9</sup> Biotechnology Research Center, Mashhad University of Medical Sciences, Mashhad, Iran

**\*Corresponding author:** Professor Steve E Humphries, Centre for Cardiovascular Genetics, Institute of Cardiovascular Science, 5 University Street, University College London, London, UK WC1E 6JF, Tel 0207 679 6962 , email: [steve.humphries@ucl.ac.uk](mailto:steve.humphries@ucl.ac.uk)

## Supplementary

### Figures

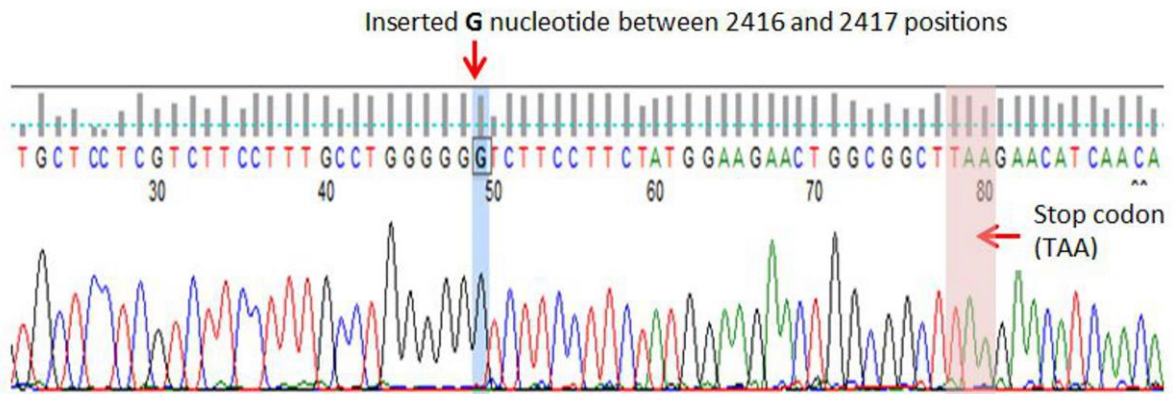

**Figure S1: Electropherogram for DNA sequence analysis of 19: c.2416\_2417insG (LDLR, p.Val806Glyfs\*11)**

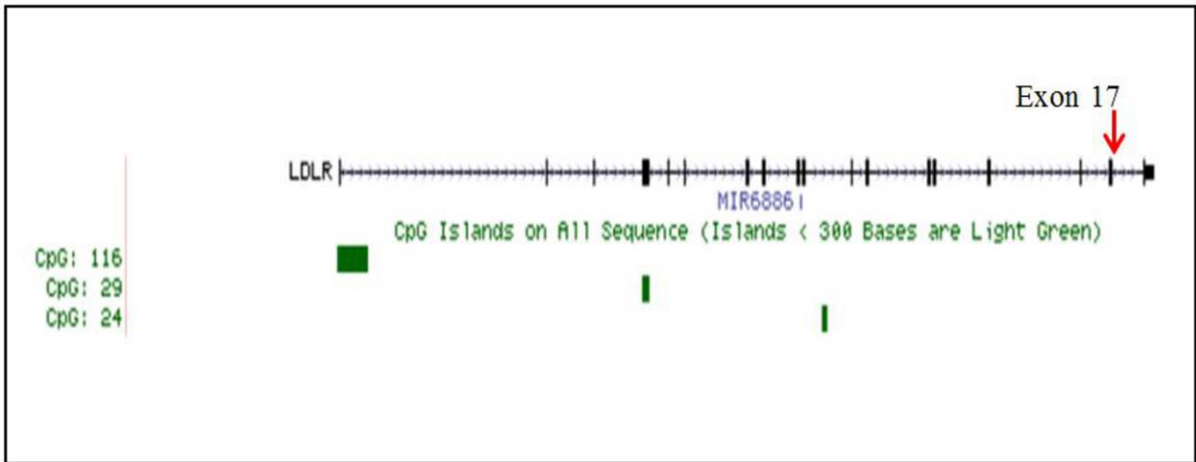

**Figure S2: The CpG island map of *LDLR* gene by ENCODE, displayed using UCSC genome Browser**

Green boxes are indicating CpG islands. CpG island map shows that *LDLR* gene has three CpG islands, in the promoter and 5'UTR (CpG: 116), in exon 4 (CpG: 29), and in intron 10 (CpG: 24).

| Target          | Orientation | sequences                 |
|-----------------|-------------|---------------------------|
| LDLR promoter   | Forward     | CAGCTCTTCACCGGAGACCC      |
|                 | Reverse     | ACCTGCTGTGTCTAGCTGG       |
| LDLR- Exon 1    | Forward     | ACTCTCCCCCTGCTAGAAACCTCA  |
|                 | Reverse     | CTATTCTGGCGCCTGGAGCAAGCC  |
| LDLR- Exon 2    | Forward     | TTGAGAGACCCTTTCTCCTTTTCC  |
|                 | Reverse     | GCATATCATGCCCAAAGGGG      |
| LDLR- Exon 3    | Forward     | TCAGTGGGTCTTTCCTTTGAG     |
|                 | Reverse     | CAGGACCCCGTAGAGACAAA      |
| LDLR- Exon 4.1  | Forward     | TGGTGTGGGAGACTTCACA       |
|                 | Reverse     | CACTCATCCGAGCCATCTTC      |
| LDLR- Exon 4.2  | Forward     | AAGTGCATCTCTCGGCAGTT      |
|                 | Reverse     | CCCCTTGGAACACGTAAAGA      |
| LDLR- Exon 4.3  | Forward     | AGCTTCCAGTGCAACAGCTC      |
|                 | Reverse     | CATACCGCAGTTTTCTCTCGT     |
| LDLR- Exon 4.4  | Forward     | TGTTCCAAGGGGACAGTAGC      |
|                 | Reverse     | AAATCACTGCATGTCCCACA      |
| LDLR- Exon 5    | Forward     | AGAAAATCAACACACTCTGTCCTG  |
|                 | Reverse     | GGAAAACCAGATGGCCAGCG      |
| LDLR- Exon 6    | Forward     | TCCTCCTTCCTCTCTGTC        |
|                 | Reverse     | TCTGCAAGCCGCCTGCACCG      |
| LDLR- Exon 7    | Forward     | GGCGAAGGGATGGGTAGGGG      |
|                 | Reverse     | GTTGCCATGTCAGGAAGCGC      |
| LDLR- Exon 8    | Forward     | CATTGGGGAAGAGCCTCCCC      |
|                 | Reverse     | GCCTGCAAGGGGTGAGGCCG      |
| LDLR- Exon 9    | Forward     | TCCATCGACGGGTCCCCTCTGACCC |
|                 | Reverse     | AGCCCTCATCTCACCTGCGGGCCAA |
| LDLR- Exon 10.1 | Forward     | AGATGAGGGCTCCTGGTGCATGCC  |
|                 | Reverse     | GCCCTTGGTATCCGCAACAGAGACA |
| LDLR- Exon 10.2 | Forward     | GATCCACAGCAACATCTACTGGACC |
|                 | Reverse     | AGCCCTCAGCGTCGTGGATA      |
| LDLR- Exon 11   | Forward     | TCCTCCCCCGCCCTCCAGCC      |
|                 | Reverse     | GCTGGGACGGCTGTCCTGCG      |
| LDLR- Exon 12   | Forward     | GCACGTGACCTCTCCTTATCCACTT |
|                 | Reverse     | CACCTAAGTGCTTCGATCTCGTACG |
| LDLR- Exon 13   | Forward     | GTCATCTTCCTTGCTGCCTG      |
|                 | Reverse     | GTTTCCACAAGGAGGTTTCAAGGTT |
| LDLR- Exon 14   | Forward     | GAATCTTCTGGTATAGCTGAT     |
|                 | Reverse     | GCAGAGAGAGGCTCAGGAGG      |
| LDLR- Exon 15   | Forward     | GAAGGGCCTGCAGGCACGTGGCACT |
|                 | Reverse     | GTGTGGTGGCGGGCCAGTCTTT    |
| LDLR- Exon 16   | Forward     | CCTTCCTTTAGACCTGGGCC      |
|                 | Reverse     | CATAGCGGGAGGCTGTGACC      |
| LDLR- Exon 17   | Forward     | GGGTCTCTGGTCTCGGGCGC      |
|                 | Reverse     | GGCTCTGGCTTTCTAGAGAGGG    |
| LDLR- Exon 18   | Forward     | GCCTGTTTCCTGAGTGCTGG      |
|                 | Reverse     | TCTCAGGAAGGGTTCTGGGC      |

**Table S1: Primers used to amplify DNA fragments of *LDLR***

Exon 4 of the *LDLR* was screened by four overlapping PCR fragments (4.1, 4.2, 4.3, and 4.4) and exon 10 by two overlapping fragments (10.1, and 10.2).

| ID      | Gender | age | TC mmol/l | LDL mmol/l | LP(a) mg/dL | Drug therapy        | Family history of hyperlipidaemia | City         | TX  | Clinical history of MI |
|---------|--------|-----|-----------|------------|-------------|---------------------|-----------------------------------|--------------|-----|------------------------|
| FH1-P   | M      | 19  | 11.4      | 10.0       |             | Statin              | Yes                               | Esfarayen    | Yes | MI                     |
| FH1-F   | M      | 50  | 3.1       | 4.8        | 92          | -                   | Yes                               | Esfarayen    | No  | MI                     |
| FH1-M   | F      | 45  | 7.1       | 4.7        | 96          | -                   | Yes                               | Esfarayen    | No  | -                      |
| FH1-b   | M      | 8   | 6.0       | 4.3        | 112         | -                   | Yes                               | Esfarayen    | No  | -                      |
| FH2-P   | F      | 1   | 18.6      | 14.2       | 60          | Statin              | Yes                               | Esfarayen    | Yes | -                      |
| FH2-F   | M      | 32  | 7.8       | 7.8        | 33          | -                   | Yes                               | Esfarayen    | No  | -                      |
| FH2-M   | F      | 30  | 6.5       | 3.5        | 54          | -                   | Yes                               | Esfarayen    | No  | -                      |
| FH3-P   | F      | 3   | 21.5      | 16.1       | 85          | Statin              | Yes                               | Mashhad      | Yes | -                      |
| FH3-F   | M      | 30  | 6.6       | 4.2        | 11          | -                   | Yes                               | Mashhad      | No  | -                      |
| FH3-M   | F      | 28  | 6.9       | 4.2        | 58          | -                   | Yes                               | Mashhad      | No  | -                      |
| FH4-P   | M      | 2   | 20.7      | 15.0       | 19          | Ezetimibe           | Yes                               | Neyshabor    | Yes | -                      |
| FH4-F   | M      | 42  | 5.6       | 3.4        | 142         | -                   | Yes                               | Neyshabor    | No  | -                      |
| FH4-M   | F      | 31  | 5.9       | 3.3        | 23          | -                   | Yes                               | Neyshabor    | No  | -                      |
| FH4-S1  | F      | 9   | 6.0       | 3.5        | 43          | -                   | Yes                               | Neyshabor    | No  | -                      |
| FH4-S2  | F      | 12  | 4.7       | 2.5        | 48          | -                   | Yes                               | Neyshabor    | No  | -                      |
| FH5-P   | M      | 11  | 15.5      | 7.8        | 112         | Statin              | Yes                               | Neyshabor    | Yes | MI                     |
| FH5-F   | M      | 37  | 8.1       | 5.6        | 29          | -                   | Yes                               | Neyshabor    | No  | -                      |
| FH5-M   | F      | 35  | 6.5       | 4.5        | 120         | -                   | Yes                               | Neyshabor    | No  | -                      |
| FH5-b   | M      | 1   | 2.6       | 1.4        | <9          | -                   | Yes                               | Neyshabor    | No  | -                      |
| FH6-P   | F      | 6   | 22.6      | 16.6       | 24          | Ezetimibe           | Yes                               | Mashhad      | Yes | -                      |
| FH6-M   | F      | 40  | 9.8       | 7.1        | 24          | -                   | Yes                               | Mashhad      | No  | -                      |
| FH7-P   | M      | 3   | 22.5      | 17.5       | 41          | Statin              | Yes                               | Ghuchan      | Yes | -                      |
| FH7-M   | F      | 19  | 13.5      | 7.8        | 51          | -                   | Yes                               | Ghuchan      | No  | -                      |
| FH8-P   | M      | 10  | 21.7      | 19.4       | -           | Statin, Fish oil    | Yes                               | Bandar Abbas | Yes | MI                     |
| FH8-F   | M      | 40  | 7.8       | 5.2        | -           | Statin              | Yes                               | Bandar Abbas | No  | -                      |
| FH8-M   | F      | 39  | 9.3       | 5.7        | -           | Statin              | Yes                               | Bandar Abbas | Yes | -                      |
| FH8-b   | M      | 1   | 2.8       | 1.7        | -           | -                   | Yes                               | Bandar Abbas | No  | -                      |
| FH9-P1  | F      | 12  | 5.2       | 3.3        | 249.4       | Ezetimibe           | Yes                               | Shahrekord   | No  | MI                     |
| FH9-P2  | M      | 9   | 5.0       | 3.2        | 233.4       | Ezetimibe           | Yes                               | Shahrekord   | No  | -                      |
| FH9-F   | M      | 39  | 5.2       | 3.6        | 8.3         | Statin              | Yes                               | Shahrekord   | No  | -                      |
| FH9-M   | F      | 36  | 5.7       | 3.9        | 216.3       | -                   | Yes                               | Shahrekord   | No  | -                      |
| FH10-P1 | F      | 9   | 5.1       | 3.1        | 73.3        | Statin,             | Yes                               | Shahrekord   | No  | -                      |
| FH10-P2 | M      | 7   | 6.5       | 4.9        | -           | Ezetimibe, Fish oil | Yes                               | Shahrekord   | No  | -                      |
| FH10-F  | M      | 37  | 4.2       | 4.0        | -           | Statin              | Yes                               | Shahrekord   | No  | -                      |
| FH10-M  | F      | 34  | 5.6       | 3.5        | 119.7       | -                   | Yes                               | Shahrekord   | No  | -                      |
| FH11-P  | M      | 5   | 16.6      | 14.9       | <9          | Statin              | Yes                               | Gorgan       | Yes | -                      |
| FH11-F  | M      | 30  | 5.2       | 10         | 55          | -                   | Yes                               | Gorgan       | No  | -                      |
| FH11-M  | F      | 24  | 13.9      | 12.9       | <9          | -                   | Yes                               | Gorgan       | No  | -                      |
| FH12-P  | M      | 8   | 14.8      | 12.2       | 25          | Statin              | Yes                               | Gorgan       | Yes | -                      |

|         |   |    |      |      |     |                      |     |        |     |    |
|---------|---|----|------|------|-----|----------------------|-----|--------|-----|----|
| FH12-F  | M | 31 | 11.1 | 9.0  | 68  | -                    | Yes | Gorgan | No  | -  |
| FH12-M  | F | 26 | 5.3  | 6.1  | 27  | -                    | Yes | Gorgan | No  | -  |
| FH13-P  | M | 9  | 16.8 | 14.2 | 226 | Statin,<br>Ezetimibe | Yes | Gorgan | Yes | -  |
| FH13-F  | M | 37 | 5.1  | 4.2  | 20  | -                    | Yes | Gorgan | No  | -  |
| FH13-M  | F | 34 | 7.0  | 5.2  | 81  | -                    | Yes | Gorgan | No  | -  |
| FH13-b1 | M | 4  | 6.8  | 4.7  | 74  | -                    | Yes | Gorgan | No  | -  |
| FH13-b2 | M | 11 | 5.5  | 3.7  | 130 | -                    | Yes | Gorgan | No  | -  |
| FH14-P  | M | 10 | 16.5 | 15.0 |     | Statin,<br>Ezetimibe | Yes | Ahwaz  | Yes | MI |
| FH14-F  | M | 41 | 9.8  | 6.6  | -   | -                    | Yes | Ahwaz  | No  | -  |
| FH14-M  | F | 35 | 8.5  | 6.8  | -   | -                    | Yes | Ahwaz  | No  | -  |
| FH14-b  | M | 10 | 5.7  | 2.6  | -   | -                    | Yes | Ahwaz  | No  | -  |
| FH15-P  | M | 9  | 18.6 | 13   | -   | Statin,<br>Ezetimibe | Yes | Ahwaz  | Yes | -  |
| FH15-F  | M | 39 | 7.6  | 5.0  | -   | Statin               | Yes | Ahwaz  | No  | -  |
| FH15-M  | F | 38 | 7.9  | 6.1  | -   | Statin               | Yes | Ahwaz  | No  | -  |
| FH16-P  | M | 2  | 5.5  | 3.8  | -   | Statin,<br>Ezetimibe | Yes | Ahwaz  | Yes | -  |
| FH16-F  | M | 31 | 7.0  | 6    | -   | -                    | Yes | Ahwaz  | No  | -  |
| FH16-M  | F | 27 | 9.3  | 7.2  | -   | -                    | Yes | Ahwaz  | No  | -  |
| FH17-P  | F | 4  | 15.0 | 13.6 | -   | Statin,<br>Ezetimibe | Yes | Ahwaz  | Yes | -  |
| FH17-F  | M | 33 | 6.7  | 4.2  | -   | -                    | Yes | Ahwaz  | No  | -  |
| FH17-M  | F | 28 | 5.9  | 4.3  | -   | -                    | Yes | Ahwaz  | No  | -  |

**Table S2: Clinical and lipid parameters**

For subjects who are under treatment, the lipid levels shows in the table were measured after treatment, as pre-treatment levels were not available. The two subjects included in the genetic screen who did not conform to the clinical diagnosis of HoFH are shown in bold.
